# Supplementary material
Source: publisher figshare collection journal article supplement (https://acs.figshare.com/ndownloader/files/4355989)
Supplement: Supplementary file 1 [file 4355989]

data_General
_audit_creation_date                    2010-11-17
_audit_creation_method                 'by CrystalStructure 4.0'
_audit_update_record                    ?

#==============================================================================
# PROCESSING SUMMARY (IUCr Office Use Only)

_journal_date_recd_electronic           ?
_journal_date_from_coeditor             ?
_journal_date_accepted                  ?
_journal_coeditor_code                  ?

#==============================================================================
# SUBMISSION DETAILS

_publ_contact_author_name              'ENTER NAME'
_publ_contact_author_email             'ENTER EMAIL ADDRESS'
_publ_contact_author_fax               'ENTER FAX NUMBER'
_publ_contact_author_phone             'ENTER PHONE NUMBER'
_publ_contact_letter
;
    ENTER TEXT OF LETTER
;
_publ_requested_journal                'ENTER JOURNAL NAME HERE'
_publ_requested_category               'CHOOSE FI FM FO CI CM CO or AD'
_publ_requested_coeditor_name           ?

#==============================================================================
# TITLE AND AUTHOR LIST

_publ_section_title
;
    ENTER SECTION TITLE
;
_publ_section_title_footnote
;
    ENTER FOOTNOTE TO TITLE OF PAPER
;
loop_
_publ_author_name
_publ_author_footnote
_publ_author_address
' FIRST AUTHORS NAME '
;
  FIRST AUTHORS FOOTNOTES
;
;
  FIRST AUTHORS ADDRESS
;
_publ_section_synopsis
;
    ENTER SYNOPSIS
;

#==============================================================================
# TEXT

_publ_section_abstract
;
    ENTER ABSTRACT
;
_publ_section_comment
;
    ENTER TEXT
;
_publ_section_references
;
    ENTER OTHER REFERENCES

    Rigaku Americas and Rigaku Corporation. (2010).
    CrystalStructure (Version 4.0). 
    Single Crystal Structure Analysis Software.
    Rigaku Americas, 9009 TX, USA 77381-5209.
    Rigaku, Tokyo 196-8666, Japan.

    M.C. Burla, R. Caliandro, M. Camalli, B. Carrozzini, 
    G.L. Cascarano, L. De Caro, C. Giacovazzo, G. Polidori, 
    R. Spagna (2005) 
    SIR2004

    Sheldrick, G.M. (2008), Acta Cryst. A64, 112-122.

;
_publ_section_figure_captions
;
    ENTER FIGURE CAPTIONS
;
_publ_section_exptl_prep
;
    ENTER COMPOUND PREPARATION DETAILS
;
_publ_section_exptl_refinement
;
    ENTER SPECIAL DETAILS OF THE REFINEMENT
;

#==============================================================================
data__tb01

#==============================================================================
# CHEMICAL DATA

_chemical_formula_sum                  'S F O N C16 H26'
_chemical_formula_moiety               'S F O N C16 H26'
_chemical_formula_weight                299.45
_chemical_melting_point                 ?
_chemical_absolute_configuration        ad

#==============================================================================
# CRYSTAL DATA
_symmetry_cell_setting                  orthorhombic
_symmetry_space_group_name_H-M         'P 21 21 21'
_symmetry_space_group_name_Hall        'P 2ac 2ab'
_symmetry_Int_Tables_number             19
loop_
_symmetry_equiv_pos_site_id
_symmetry_equiv_pos_as_xyz
1   '+X,+Y,+Z'
2   '1/2+X,1/2-Y,-Z'
3   '-X,1/2+Y,1/2-Z'
4   '1/2-X,-Y,1/2+Z'
#------------------------------------------------------------------------------
_cell_length_a                          8.7454(2)
_cell_length_b                          10.5113(3)
_cell_length_c                          18.0667(13)
_cell_angle_alpha                       90.0000
_cell_angle_beta                        90.0000
_cell_angle_gamma                       90.0000
_cell_volume                            1660.79(13)
_cell_formula_units_Z                   4
_cell_measurement_reflns_used           4177
_cell_measurement_theta_min             4.87
_cell_measurement_theta_max             68.17
_cell_measurement_temperature           93
#------------------------------------------------------------------------------
_exptl_crystal_description              plate
_exptl_crystal_colour                   colorless
_exptl_crystal_size_max                 0.18
_exptl_crystal_size_mid                 0.10
_exptl_crystal_size_min                 0.08
_exptl_crystal_density_diffrn           1.198
_exptl_crystal_density_meas             ?
_exptl_crystal_density_method          'not measured'
_exptl_crystal_F_000                    648.00
_exptl_absorpt_coefficient_mu           1.782
_exptl_absorpt_correction_type          multi-scan
_exptl_absorpt_process_details
;
    Higashi, T. (1995). Program for Absorption Correction.
    Rigaku Corporation, Tokyo, Japan.
;
_exptl_absorpt_correction_T_min         0.621
_exptl_absorpt_correction_T_max         0.867

#==============================================================================
# EXPERIMENTAL DATA

_diffrn_ambient_temperature             93
_diffrn_radiation_type                 'Cu K\a'
_diffrn_radiation_wavelength            1.54187
_diffrn_measurement_device_type        'Rigaku R-AXIS RAPID imaging plate'
_diffrn_measurement_method              \w
_diffrn_detector_area_resol_mean        10.000
_diffrn_reflns_number                   6921
_diffrn_reflns_av_R_equivalents         0.0702
_diffrn_reflns_theta_max                68.19
_diffrn_reflns_theta_full               68.19
_diffrn_measured_fraction_theta_max     0.882
_diffrn_measured_fraction_theta_full    0.882
_diffrn_reflns_limit_h_min             -8
_diffrn_reflns_limit_h_max              10
_diffrn_reflns_limit_k_min             -9
_diffrn_reflns_limit_k_max              12
_diffrn_reflns_limit_l_min             -20
_diffrn_reflns_limit_l_max              20
_diffrn_standards_number                0
_diffrn_standards_interval_count        .
_diffrn_standards_decay_%               ?

#==============================================================================
# REFINEMENT DATA

_refine_special_details
;
    Refinement was performed using all reflections. The weighted 
    R-factor (wR) and goodness of fit (S) are based on F^2^.
    R-factor (gt) are based on F. The threshold expression of
    F^2^ > 2.0 sigma(F^2^) is used only for calculating R-factor (gt).
;
_reflns_number_total                    2687
_reflns_number_gt                       1620
_reflns_threshold_expression            F^2^>2.0\s(F^2^)
_refine_ls_structure_factor_coef        Fsqd
_refine_ls_R_factor_gt                  0.0769
_refine_ls_wR_factor_ref                0.2081
_refine_ls_number_restraints            0
_refine_ls_hydrogen_treatment           mixed
_refine_ls_number_reflns                2687
_refine_ls_number_parameters            186
_refine_ls_goodness_of_fit_ref          1.120
_refine_ls_weighting_scheme             calc
_refine_ls_weighting_details
           'w = 1/[\s^2^(Fo^2^)+(0.0827P)^2^+0.3304P] where P=(Fo^2^+2Fc^2^)/3'
_atom_sites_solution_hydrogens          geom
_atom_sites_solution_primary            direct
_atom_sites_solution_secondary          difmap
_refine_ls_shift/su_max                 0.000
_refine_diff_density_max                0.770
_refine_diff_density_min               -0.570
_refine_ls_extinction_method            SHELXL
_refine_ls_extinction_coef              0.0029(7)
_refine_ls_abs_structure_details
            'Flack, H. D. (1983), Acta Cryst. A39, 876-881.  959 Friedel Pairs'
_refine_ls_abs_structure_Flack          0.06(5)

loop_
_atom_type_symbol
_atom_type_description
_atom_type_scat_dispersion_real
_atom_type_scat_dispersion_imag
_atom_type_scat_source
  'S' 'S'  0.333 0.557 
;
International Tables for Crystallography
(1992, Vol. C, Tables 4.2.6.8 and 6.1.1.4)
;
  'F' 'F'  0.073 0.053 
;
International Tables for Crystallography
(1992, Vol. C, Tables 4.2.6.8 and 6.1.1.4)
;
  'O' 'O'  0.049 0.032 
;
International Tables for Crystallography
(1992, Vol. C, Tables 4.2.6.8 and 6.1.1.4)
;
  'N' 'N'  0.031 0.018 
;
International Tables for Crystallography
(1992, Vol. C, Tables 4.2.6.8 and 6.1.1.4)
;
  'C' 'C'  0.018 0.009 
;
International Tables for Crystallography
(1992, Vol. C, Tables 4.2.6.8 and 6.1.1.4)
;
  'H' 'H'  0.000 0.000 
;
International Tables for Crystallography
(1992, Vol. C, Table 6.1.1.4)
;

#==============================================================================
# ATOMIC COORDINATES AND THERMAL PARAMETERS

loop_
_atom_site_label
_atom_site_type_symbol
_atom_site_fract_x
_atom_site_fract_y
_atom_site_fract_z
_atom_site_U_iso_or_equiv
_atom_site_adp_type
_atom_site_occupancy
_atom_site_symmetry_multiplicity
_atom_site_calc_flag
_atom_site_refinement_flags
_atom_site_disorder_assembly
_atom_site_disorder_group
 S(1) S 0.47767(18) 0.78195(15) 0.38887(9) 0.0359(5) Uani 1.00 4 d . . .
 F(1) F 1.2008(4) 0.8138(3) 0.2114(2) 0.0469(11) Uani 1.00 4 d . . .
 O(1) O 0.3777(4) 0.7220(4) 0.4473(2) 0.0371(11) Uani 1.00 4 d . . .
 N(1) N 0.6157(6) 0.8618(5) 0.4287(3) 0.0328(14) Uani 1.00 4 d . . .
 C(1) C 0.5818(7) 0.6484(5) 0.3468(3) 0.0283(15) Uani 1.00 4 d . . .
 C(2) C 0.4592(6) 0.5600(6) 0.3162(3) 0.0421(18) Uani 1.00 4 d . . .
 C(3) C 0.6790(7) 0.5800(6) 0.4046(3) 0.0405(18) Uani 1.00 4 d . . .
 C(4) C 0.6763(7) 0.7046(6) 0.2831(3) 0.0388(16) Uani 1.00 4 d . . .
 C(5) C 0.6415(7) 0.9996(6) 0.4140(3) 0.0314(15) Uani 1.00 4 d . . .
 C(6) C 0.5310(7) 1.0894(6) 0.4567(4) 0.0355(16) Uani 1.00 4 d . . .
 C(7) C 0.3666(7) 1.0567(6) 0.4380(4) 0.0373(17) Uani 1.00 4 d . . .
 C(8) C 0.5575(7) 1.0797(6) 0.5409(3) 0.0427(18) Uani 1.00 4 d . . .
 C(9) C 0.5609(7) 1.2271(6) 0.4313(4) 0.0434(18) Uani 1.00 4 d . . .
 C(10) C 0.8133(6) 1.0246(6) 0.4267(4) 0.0355(17) Uani 1.00 4 d . . .
 C(11) C 0.9156(7) 0.9652(6) 0.3700(4) 0.0306(15) Uani 1.00 4 d . . .
 C(12) C 0.9228(7) 1.0179(6) 0.2987(4) 0.0359(16) Uani 1.00 4 d . . .
 C(13) C 1.0177(8) 0.9661(6) 0.2453(4) 0.0388(17) Uani 1.00 4 d . . .
 C(14) C 1.1021(7) 0.8619(6) 0.2639(4) 0.0355(16) Uani 1.00 4 d . . .
 C(15) C 1.1000(7) 0.8069(6) 0.3324(4) 0.0374(16) Uani 1.00 4 d . . .
 C(16) C 1.0032(6) 0.8592(5) 0.3860(3) 0.0329(15) Uani 1.00 4 d . . .
 H(2A) H 0.5077 0.4914 0.2879 0.051 Uiso 1.00 4 calc R . .
 H(2B) H 0.3905 0.6082 0.2838 0.051 Uiso 1.00 4 calc R . .
 H(2C) H 0.4004 0.5236 0.3572 0.051 Uiso 1.00 4 calc R . .
 H(3A) H 0.7676 0.6328 0.4172 0.049 Uiso 1.00 4 calc R . .
 H(3B) H 0.7141 0.4985 0.3845 0.049 Uiso 1.00 4 calc R . .
 H(3C) H 0.6177 0.5649 0.4491 0.049 Uiso 1.00 4 calc R . .
 H(4A) H 0.7325 0.6362 0.2581 0.047 Uiso 1.00 4 calc R . .
 H(4B) H 0.7489 0.7670 0.3029 0.047 Uiso 1.00 4 calc R . .
 H(4C) H 0.6079 0.7463 0.2477 0.047 Uiso 1.00 4 calc R . .
 H(5) H 0.6218 1.0133 0.3601 0.038 Uiso 1.00 4 calc R . .
 H(7A) H 0.2979 1.1169 0.4628 0.045 Uiso 1.00 4 calc R . .
 H(7B) H 0.3439 0.9701 0.4549 0.045 Uiso 1.00 4 calc R . .
 H(7C) H 0.3518 1.0621 0.3844 0.045 Uiso 1.00 4 calc R . .
 H(8A) H 0.5347 0.9930 0.5575 0.051 Uiso 1.00 4 calc R . .
 H(8B) H 0.4903 1.1399 0.5665 0.051 Uiso 1.00 4 calc R . .
 H(8C) H 0.6643 1.1000 0.5522 0.051 Uiso 1.00 4 calc R . .
 H(9A) H 0.6661 1.2512 0.4437 0.052 Uiso 1.00 4 calc R . .
 H(9B) H 0.4895 1.2846 0.4563 0.052 Uiso 1.00 4 calc R . .
 H(9C) H 0.5462 1.2331 0.3776 0.052 Uiso 1.00 4 calc R . .
 H(10A) H 0.8310 1.1176 0.4269 0.043 Uiso 1.00 4 calc R . .
 H(10B) H 0.8420 0.9917 0.4762 0.043 Uiso 1.00 4 calc R . .
 H(12) H 0.8619 1.0900 0.2870 0.043 Uiso 1.00 4 calc R . .
 H(13) H 1.0238 1.0021 0.1971 0.047 Uiso 1.00 4 calc R . .
 H(15) H 1.1624 0.7353 0.3433 0.045 Uiso 1.00 4 calc R . .
 H(16) H 0.9976 0.8216 0.4337 0.039 Uiso 1.00 4 calc R . .
 H(1N) H 0.692(6) 0.821(5) 0.462(3) 0.037(18) Uiso 1.00 4 d . . .


loop_
_atom_site_aniso_label
_atom_site_aniso_U_11
_atom_site_aniso_U_22
_atom_site_aniso_U_33
_atom_site_aniso_U_12
_atom_site_aniso_U_13
_atom_site_aniso_U_23
 S(1) 0.0288(8) 0.0319(9) 0.0469(10) 0.0007(8) -0.0011(8) 0.0002(9)
 F(1) 0.041(2) 0.039(2) 0.060(3) 0.0005(19) 0.0207(20) -0.003(2)
 O(1) 0.025(2) 0.037(3) 0.050(3) -0.001(2) 0.010(2) 0.008(2)
 N(1) 0.026(3) 0.029(3) 0.043(4) -0.005(2) -0.010(3) -0.002(3)
 C(1) 0.019(3) 0.023(3) 0.042(4) -0.002(3) 0.002(3) -0.005(3)
 C(2) 0.029(4) 0.036(4) 0.062(5) -0.002(3) -0.007(4) -0.004(3)
 C(3) 0.034(4) 0.033(4) 0.054(5) 0.009(3) -0.005(4) 0.007(4)
 C(4) 0.035(4) 0.038(4) 0.043(4) 0.004(3) 0.005(3) -0.002(4)
 C(5) 0.029(3) 0.023(3) 0.043(4) -0.004(3) 0.000(3) 0.005(3)
 C(6) 0.033(4) 0.031(4) 0.042(4) 0.003(3) 0.001(3) -0.001(3)
 C(7) 0.035(4) 0.035(4) 0.041(4) 0.000(3) 0.004(3) -0.003(3)
 C(8) 0.042(4) 0.047(4) 0.040(4) 0.000(3) 0.001(3) -0.001(4)
 C(9) 0.041(4) 0.031(4) 0.059(5) -0.000(3) 0.013(3) 0.002(4)
 C(10) 0.027(3) 0.026(4) 0.054(4) -0.009(3) -0.000(3) -0.003(3)
 C(11) 0.019(3) 0.026(3) 0.047(4) -0.000(3) -0.004(3) -0.001(3)
 C(12) 0.028(3) 0.032(4) 0.048(4) 0.000(3) -0.002(3) 0.011(3)
 C(13) 0.030(4) 0.038(4) 0.049(4) 0.010(3) 0.008(3) 0.009(3)
 C(14) 0.026(3) 0.035(4) 0.045(4) 0.002(3) 0.011(3) -0.003(3)
 C(15) 0.031(3) 0.028(4) 0.054(4) -0.005(3) -0.009(3) 0.003(3)
 C(16) 0.027(3) 0.030(3) 0.042(4) 0.004(3) 0.001(3) 0.006(3)

#==============================================================================
_computing_data_collection
                                 'CrystalClear-SM Expert 2.0 r5 (Rigaku, 2010)'
_computing_cell_refinement             'CrystalClear-SM Expert 2.0 r5'
_computing_data_reduction              'CrystalClear-SM Expert 2.0 r5'
_computing_structure_solution          'SIR2004 (Burla, et al., 2005)'
_computing_structure_refinement        'SHELXL97 (Sheldrick, 1997)'
_computing_publication_material        'CrystalStructure 4.0 (Rigaku, 2010)'
_computing_molecular_graphics          'CrystalStructure 4.0'

#==============================================================================
# MOLECULAR GEOMETRY

_geom_special_details
;
    ENTER SPECIAL DETAILS OF THE MOLECULAR GEOMETRY
;

loop_
_geom_bond_atom_site_label_1
_geom_bond_atom_site_label_2
_geom_bond_distance
_geom_bond_publ_flag
_geom_bond_site_symmetry_1
_geom_bond_site_symmetry_2
S(1) O(1) 1.508(4) yes . .
S(1) N(1) 1.637(5) yes . .
S(1) C(1) 1.838(6) yes . .
F(1) C(14) 1.378(7) yes . .
N(1) C(5) 1.489(8) yes . .
C(1) C(2) 1.523(8) yes . .
C(1) C(3) 1.526(8) yes . .
C(1) C(4) 1.534(8) yes . .
C(5) C(6) 1.557(9) yes . .
C(5) C(10) 1.542(8) yes . .
C(6) C(7) 1.516(9) yes . .
C(6) C(8) 1.541(8) yes . .
C(6) C(9) 1.541(9) yes . .
C(10) C(11) 1.497(8) yes . .
C(11) C(12) 1.404(9) yes . .
C(11) C(16) 1.383(8) yes . .
C(12) C(13) 1.384(9) yes . .
C(13) C(14) 1.364(9) yes . .
C(14) C(15) 1.366(9) yes . .
C(15) C(16) 1.398(9) yes . .
N(1) H(1N) 1.00(5) yes . .
C(2) H(2A) 0.980 yes . .
C(2) H(2B) 0.980 yes . .
C(2) H(2C) 0.980 yes . .
C(3) H(3A) 0.980 yes . .
C(3) H(3B) 0.980 yes . .
C(3) H(3C) 0.980 yes . .
C(4) H(4A) 0.980 yes . .
C(4) H(4B) 0.980 yes . .
C(4) H(4C) 0.980 yes . .
C(5) H(5) 1.000 yes . .
C(7) H(7A) 0.980 yes . .
C(7) H(7B) 0.980 yes . .
C(7) H(7C) 0.980 yes . .
C(8) H(8A) 0.980 yes . .
C(8) H(8B) 0.980 yes . .
C(8) H(8C) 0.980 yes . .
C(9) H(9A) 0.980 yes . .
C(9) H(9B) 0.980 yes . .
C(9) H(9C) 0.980 yes . .
C(10) H(10A) 0.990 yes . .
C(10) H(10B) 0.990 yes . .
C(12) H(12) 0.950 yes . .
C(13) H(13) 0.950 yes . .
C(15) H(15) 0.950 yes . .
C(16) H(16) 0.950 yes . .

loop_
_geom_angle_atom_site_label_1
_geom_angle_atom_site_label_2
_geom_angle_atom_site_label_3
_geom_angle
_geom_angle_publ_flag
_geom_angle_site_symmetry_1
_geom_angle_site_symmetry_2
_geom_angle_site_symmetry_3
O(1) S(1) N(1) 109.5(3) yes . . .
O(1) S(1) C(1) 104.9(3) yes . . .
N(1) S(1) C(1) 102.0(3) yes . . .
S(1) N(1) C(5) 122.2(4) yes . . .
S(1) C(1) C(2) 105.5(4) yes . . .
S(1) C(1) C(3) 110.6(4) yes . . .
S(1) C(1) C(4) 106.4(4) yes . . .
C(2) C(1) C(3) 110.7(5) yes . . .
C(2) C(1) C(4) 110.0(5) yes . . .
C(3) C(1) C(4) 113.2(5) yes . . .
N(1) C(5) C(6) 114.0(5) yes . . .
N(1) C(5) C(10) 106.7(5) yes . . .
C(6) C(5) C(10) 115.3(5) yes . . .
C(5) C(6) C(7) 109.9(5) yes . . .
C(5) C(6) C(8) 110.8(5) yes . . .
C(5) C(6) C(9) 108.5(5) yes . . .
C(7) C(6) C(8) 110.3(5) yes . . .
C(7) C(6) C(9) 107.9(5) yes . . .
C(8) C(6) C(9) 109.4(5) yes . . .
C(5) C(10) C(11) 114.1(5) yes . . .
C(10) C(11) C(12) 119.4(5) yes . . .
C(10) C(11) C(16) 121.6(6) yes . . .
C(12) C(11) C(16) 119.0(6) yes . . .
C(11) C(12) C(13) 120.8(6) yes . . .
C(12) C(13) C(14) 117.9(6) yes . . .
F(1) C(14) C(13) 117.6(6) yes . . .
F(1) C(14) C(15) 118.5(5) yes . . .
C(13) C(14) C(15) 123.9(6) yes . . .
C(14) C(15) C(16) 117.9(6) yes . . .
C(11) C(16) C(15) 120.5(6) yes . . .
S(1) N(1) H(1N) 122(3) yes . . .
C(5) N(1) H(1N) 115(3) yes . . .
C(1) C(2) H(2A) 109.468 yes . . .
C(1) C(2) H(2B) 109.473 yes . . .
C(1) C(2) H(2C) 109.478 yes . . .
H(2A) C(2) H(2B) 109.469 yes . . .
H(2A) C(2) H(2C) 109.467 yes . . .
H(2B) C(2) H(2C) 109.472 yes . . .
C(1) C(3) H(3A) 109.471 yes . . .
C(1) C(3) H(3B) 109.468 yes . . .
C(1) C(3) H(3C) 109.475 yes . . .
H(3A) C(3) H(3B) 109.469 yes . . .
H(3A) C(3) H(3C) 109.470 yes . . .
H(3B) C(3) H(3C) 109.474 yes . . .
C(1) C(4) H(4A) 109.472 yes . . .
C(1) C(4) H(4B) 109.479 yes . . .
C(1) C(4) H(4C) 109.475 yes . . .
H(4A) C(4) H(4B) 109.465 yes . . .
H(4A) C(4) H(4C) 109.467 yes . . .
H(4B) C(4) H(4C) 109.469 yes . . .
N(1) C(5) H(5) 106.749 yes . . .
C(6) C(5) H(5) 106.751 yes . . .
C(10) C(5) H(5) 106.753 yes . . .
C(6) C(7) H(7A) 109.470 yes . . .
C(6) C(7) H(7B) 109.470 yes . . .
C(6) C(7) H(7C) 109.468 yes . . .
H(7A) C(7) H(7B) 109.470 yes . . .
H(7A) C(7) H(7C) 109.473 yes . . .
H(7B) C(7) H(7C) 109.477 yes . . .
C(6) C(8) H(8A) 109.464 yes . . .
C(6) C(8) H(8B) 109.473 yes . . .
C(6) C(8) H(8C) 109.469 yes . . .
H(8A) C(8) H(8B) 109.475 yes . . .
H(8A) C(8) H(8C) 109.475 yes . . .
H(8B) C(8) H(8C) 109.472 yes . . .
C(6) C(9) H(9A) 109.472 yes . . .
C(6) C(9) H(9B) 109.475 yes . . .
C(6) C(9) H(9C) 109.471 yes . . .
H(9A) C(9) H(9B) 109.469 yes . . .
H(9A) C(9) H(9C) 109.464 yes . . .
H(9B) C(9) H(9C) 109.475 yes . . .
C(5) C(10) H(10A) 108.726 yes . . .
C(5) C(10) H(10B) 108.727 yes . . .
C(11) C(10) H(10A) 108.718 yes . . .
C(11) C(10) H(10B) 108.726 yes . . .
H(10A) C(10) H(10B) 107.642 yes . . .
C(11) C(12) H(12) 119.620 yes . . .
C(13) C(12) H(12) 119.628 yes . . .
C(12) C(13) H(13) 121.035 yes . . .
C(14) C(13) H(13) 121.045 yes . . .
C(14) C(15) H(15) 121.037 yes . . .
C(16) C(15) H(15) 121.041 yes . . .
C(11) C(16) H(16) 119.743 yes . . .
C(15) C(16) H(16) 119.733 yes . . .

loop_
_geom_torsion_atom_site_label_1
_geom_torsion_atom_site_label_2
_geom_torsion_atom_site_label_3
_geom_torsion_atom_site_label_4
_geom_torsion
_geom_torsion_publ_flag
_geom_torsion_site_symmetry_1
_geom_torsion_site_symmetry_2
_geom_torsion_site_symmetry_3
_geom_torsion_site_symmetry_4
O(1) S(1) N(1) C(5) -123.6(4) no . . . .
O(1) S(1) C(1) C(2) 59.1(4) no . . . .
O(1) S(1) C(1) C(3) -60.6(4) no . . . .
N(1) S(1) C(1) C(3) 53.6(4) no . . . .
N(1) S(1) C(1) C(4) -69.8(4) no . . . .
C(1) S(1) N(1) C(5) 125.7(4) no . . . .
S(1) N(1) C(5) C(6) 79.2(5) no . . . .
S(1) N(1) C(5) C(10) -152.3(3) no . . . .
N(1) C(5) C(6) C(7) -57.3(6) no . . . .
N(1) C(5) C(6) C(8) 64.9(6) no . . . .
N(1) C(5) C(10) C(11) 69.2(6) no . . . .
C(10) C(5) C(6) C(8) -59.1(6) no . . . .
C(10) C(5) C(6) C(9) 61.0(6) no . . . .
C(5) C(10) C(11) C(12) 73.5(6) no . . . .
C(5) C(10) C(11) C(16) -106.4(6) no . . . .
C(12) C(11) C(16) C(15) 1.3(8) no . . . .
C(16) C(11) C(12) C(13) -0.9(8) no . . . .
C(11) C(12) C(13) C(14) 0.7(9) no . . . .
C(12) C(13) C(14) C(15) -1.0(9) no . . . .
C(13) C(14) C(15) C(16) 1.4(9) no . . . .
C(14) C(15) C(16) C(11) -1.5(8) no . . . .

loop_
_geom_contact_atom_site_label_1
_geom_contact_atom_site_label_2
_geom_contact_distance
_geom_contact_publ_flag
_geom_contact_site_symmetry_1
_geom_contact_site_symmetry_2
S(1) C(6) 3.488(6) yes . .
S(1) C(7) 3.174(7) yes . .
O(1) C(2) 3.002(7) yes . .
O(1) C(3) 3.124(7) yes . .
O(1) C(7) 3.524(8) yes . .
N(1) C(3) 3.044(8) yes . .
N(1) C(4) 3.152(8) yes . .
N(1) C(7) 2.995(8) yes . .
N(1) C(8) 3.100(8) yes . .
N(1) C(11) 3.031(8) yes . .
N(1) C(16) 3.476(7) yes . .
C(5) C(12) 3.230(9) yes . .
C(5) C(16) 3.527(8) yes . .
C(8) C(10) 3.098(8) yes . .
C(9) C(10) 3.068(8) yes . .
C(11) C(14) 2.740(9) yes . .
C(12) C(15) 2.774(9) yes . .
C(13) C(16) 2.782(9) yes . .
S(1) C(15) 3.466(6) yes . 1_455
F(1) C(9) 3.438(7) yes . 3_745
F(1) C(12) 3.297(7) yes . 3_745
O(1) N(1) 3.324(6) yes . 2_466
O(1) C(10) 3.495(7) yes . 2_466
O(1) C(15) 3.317(7) yes . 1_455
O(1) C(16) 3.318(7) yes . 2_466
N(1) O(1) 3.324(6) yes . 2_566
C(3) C(7) 3.584(9) yes . 2_566
C(7) C(3) 3.584(9) yes . 2_466
C(9) F(1) 3.438(7) yes . 3_755
C(10) O(1) 3.495(7) yes . 2_566
C(12) F(1) 3.297(7) yes . 3_755
C(15) S(1) 3.466(6) yes . 1_655
C(15) O(1) 3.317(7) yes . 1_655
C(16) O(1) 3.318(7) yes . 2_566
S(1) H(2A) 3.5665 yes . .
S(1) H(2B) 2.7428 yes . .
S(1) H(2C) 2.8565 yes . .
S(1) H(3A) 3.0247 yes . .
S(1) H(3C) 2.8084 yes . .
S(1) H(4A) 3.5902 yes . .
S(1) H(4B) 2.8399 yes . .
S(1) H(4C) 2.8186 yes . .
S(1) H(5) 2.7883 yes . .
S(1) H(7B) 2.5890 yes . .
S(1) H(7C) 3.1447 yes . .
F(1) H(13) 2.5259 yes . .
F(1) H(15) 2.5437 yes . .
O(1) H(2B) 3.1890 yes . .
O(1) H(2C) 2.6523 yes . .
O(1) H(3A) 3.5775 yes . .
O(1) H(3C) 2.6699 yes . .
O(1) H(7B) 2.6288 yes . .
O(1) H(1N) 2.95(5) yes . .
N(1) H(3A) 2.7573 yes . .
N(1) H(3C) 3.1422 yes . .
N(1) H(4B) 2.7426 yes . .
N(1) H(4C) 3.4897 yes . .
N(1) H(7B) 2.6773 yes . .
N(1) H(7C) 3.2249 yes . .
N(1) H(8A) 2.7960 yes . .
N(1) H(8C) 3.3799 yes . .
N(1) H(10A) 3.2828 yes . .
N(1) H(10B) 2.5523 yes . .
N(1) H(16) 3.3679 yes . .
C(1) H(1N) 2.93(6) yes . .
C(2) H(3A) 3.3455 yes . .
C(2) H(3B) 2.6293 yes . .
C(2) H(3C) 2.7733 yes . .
C(2) H(4A) 2.7303 yes . .
C(2) H(4B) 3.3477 yes . .
C(2) H(4C) 2.6566 yes . .
C(3) H(2A) 2.7487 yes . .
C(3) H(2B) 3.3492 yes . .
C(3) H(2C) 2.6495 yes . .
C(3) H(4A) 2.7512 yes . .
C(3) H(4B) 2.7590 yes . .
C(3) H(4C) 3.3880 yes . .
C(3) H(1N) 2.74(6) yes . .
C(4) H(2A) 2.6834 yes . .
C(4) H(2B) 2.6964 yes . .
C(4) H(2C) 3.3515 yes . .
C(4) H(3A) 2.6603 yes . .
C(4) H(3B) 2.8563 yes . .
C(4) H(3C) 3.3783 yes . .
C(4) H(5) 3.5630 yes . .
C(4) H(1N) 3.46(6) yes . .
C(5) H(4B) 3.3004 yes . .
C(5) H(7A) 3.3657 yes . .
C(5) H(7B) 2.7229 yes . .
C(5) H(7C) 2.6723 yes . .
C(5) H(8A) 2.7564 yes . .
C(5) H(8B) 3.3939 yes . .
C(5) H(8C) 2.7170 yes . .
C(5) H(9A) 2.7075 yes . .
C(5) H(9B) 3.3663 yes . .
C(5) H(9C) 2.6746 yes . .
C(5) H(12) 3.1448 yes . .
C(6) H(10A) 2.6947 yes . .
C(6) H(10B) 2.9283 yes . .
C(6) H(1N) 3.16(6) yes . .
C(7) H(5) 2.6781 yes . .
C(7) H(8A) 2.6960 yes . .
C(7) H(8B) 2.7062 yes . .
C(7) H(8C) 3.3522 yes . .
C(7) H(9A) 3.3238 yes . .
C(7) H(9B) 2.6460 yes . .
C(7) H(9C) 2.6636 yes . .
C(8) H(5) 3.3873 yes . .
C(8) H(7A) 2.7013 yes . .
C(8) H(7B) 2.6889 yes . .
C(8) H(7C) 3.3569 yes . .
C(8) H(9A) 2.6900 yes . .
C(8) H(9B) 2.7076 yes . .
C(8) H(9C) 3.3636 yes . .
C(8) H(10A) 3.1816 yes . .
C(8) H(10B) 2.9008 yes . .
C(8) H(1N) 3.29(6) yes . .
C(9) H(5) 2.6433 yes . .
C(9) H(7A) 2.6376 yes . .
C(9) H(7B) 3.3284 yes . .
C(9) H(7C) 2.6594 yes . .
C(9) H(8A) 3.3632 yes . .
C(9) H(8B) 2.6825 yes . .
C(9) H(8C) 2.7153 yes . .
C(9) H(10A) 2.6288 yes . .
C(9) H(10B) 3.5813 yes . .
C(10) H(4B) 3.5583 yes . .
C(10) H(8A) 3.4105 yes . .
C(10) H(8C) 2.7314 yes . .
C(10) H(9A) 2.7252 yes . .
C(10) H(9C) 3.3238 yes . .
C(10) H(12) 2.6516 yes . .
C(10) H(16) 2.6769 yes . .
C(10) H(1N) 2.48(6) yes . .
C(11) H(4B) 2.8174 yes . .
C(11) H(5) 2.6243 yes . .
C(11) H(13) 3.2861 yes . .
C(11) H(15) 3.2759 yes . .
C(11) H(1N) 2.98(5) yes . .
C(12) H(4B) 3.0464 yes . .
C(12) H(5) 2.8571 yes . .
C(12) H(10A) 2.6664 yes . .
C(12) H(10B) 3.2953 yes . .
C(12) H(16) 3.2616 yes . .
C(13) H(4B) 3.3157 yes . .
C(13) H(15) 3.2600 yes . .
C(14) H(4B) 3.3215 yes . .
C(14) H(12) 3.2149 yes . .
C(14) H(16) 3.2282 yes . .
C(15) H(4B) 3.1454 yes . .
C(15) H(13) 3.2604 yes . .
C(16) H(3A) 3.1977 yes . .
C(16) H(4B) 2.8535 yes . .
C(16) H(10A) 3.1931 yes . .
C(16) H(10B) 2.5660 yes . .
C(16) H(12) 3.2578 yes . .
C(16) H(1N) 3.08(5) yes . .
H(2A) H(3A) 3.5824 yes . .
H(2A) H(3B) 2.5124 yes . .
H(2A) H(3C) 3.1630 yes . .
H(2A) H(4A) 2.5441 yes . .
H(2A) H(4B) 3.5931 yes . .
H(2A) H(4C) 2.9112 yes . .
H(2B) H(3B) 3.5571 yes . .
H(2B) H(4A) 3.0402 yes . .
H(2B) H(4B) 3.5670 yes . .
H(2B) H(4C) 2.4789 yes . .
H(2C) H(3A) 3.5785 yes . .
H(2C) H(3B) 2.7998 yes . .
H(2C) H(3C) 2.5603 yes . .
H(2C) H(4C) 3.5625 yes . .
H(3A) H(4A) 2.8908 yes . .
H(3A) H(4B) 2.5069 yes . .
H(3A) H(4C) 3.5718 yes . .
H(3A) H(16) 2.8409 yes . .
H(3A) H(1N) 2.2346 yes . .
H(3B) H(4A) 2.7089 yes . .
H(3B) H(4B) 3.1990 yes . .
H(3C) H(4B) 3.5791 yes . .
H(3C) H(1N) 2.7750 yes . .
H(4B) H(5) 3.0016 yes . .
H(4B) H(12) 3.5485 yes . .
H(4B) H(16) 3.2635 yes . .
H(4B) H(1N) 2.9762 yes . .
H(4C) H(5) 3.4667 yes . .
H(5) H(7A) 3.5568 yes . .
H(5) H(7B) 3.0073 yes . .
H(5) H(7C) 2.4562 yes . .
H(5) H(9A) 2.9467 yes . .
H(5) H(9B) 3.5346 yes . .
H(5) H(9C) 2.4234 yes . .
H(5) H(10A) 2.4505 yes . .
H(5) H(10B) 2.8558 yes . .
H(5) H(12) 2.6087 yes . .
H(5) H(1N) 2.8085 yes . .
H(7A) H(8A) 2.9851 yes . .
H(7A) H(8B) 2.5302 yes . .
H(7A) H(8C) 3.5926 yes . .
H(7A) H(9A) 3.5326 yes . .
H(7A) H(9B) 2.4351 yes . .
H(7A) H(9C) 2.9285 yes . .
H(7B) H(8A) 2.5059 yes . .
H(7B) H(8B) 2.9819 yes . .
H(7B) H(8C) 3.5785 yes . .
H(7B) H(9B) 3.5423 yes . .
H(7B) H(9C) 3.5660 yes . .
H(7B) H(1N) 3.4294 yes . .
H(7C) H(8A) 3.5877 yes . .
H(7C) H(9A) 3.5576 yes . .
H(7C) H(9B) 2.9344 yes . .
H(7C) H(9C) 2.4773 yes . .
H(8A) H(9A) 3.5938 yes . .
H(8A) H(9B) 3.5914 yes . .
H(8A) H(10B) 3.0631 yes . .
H(8A) H(1N) 2.8535 yes . .
H(8B) H(9A) 2.9428 yes . .
H(8B) H(9B) 2.5066 yes . .
H(8B) H(9C) 3.5850 yes . .
H(8C) H(9A) 2.5229 yes . .
H(8C) H(9B) 3.0173 yes . .
H(8C) H(10A) 2.6979 yes . .
H(8C) H(10B) 2.3655 yes . .
H(8C) H(1N) 3.3653 yes . .
H(9A) H(10A) 2.0357 yes . .
H(9A) H(10B) 3.1865 yes . .
H(9B) H(10A) 3.5051 yes . .
H(9C) H(10A) 2.9103 yes . .
H(9C) H(12) 3.5449 yes . .
H(10A) H(12) 2.5594 yes . .
H(10A) H(16) 3.4381 yes . .
H(10A) H(1N) 3.4105 yes . .
H(10B) H(12) 3.5756 yes . .
H(10B) H(16) 2.3742 yes . .
H(10B) H(1N) 2.2393 yes . .
H(12) H(13) 2.3435 yes . .
H(15) H(16) 2.3594 yes . .
H(16) H(1N) 2.7210 yes . .
S(1) H(15) 2.9185 yes . 1_455
S(1) H(16) 3.3897 yes . 2_466
F(1) H(2A) 3.1607 yes . 3_755
F(1) H(2B) 3.0218 yes . 1_655
F(1) H(3B) 2.7075 yes . 3_755
F(1) H(4A) 3.4832 yes . 3_755
F(1) H(8B) 3.1432 yes . 4_674
F(1) H(9A) 3.1053 yes . 3_745
F(1) H(9C) 2.8640 yes . 3_745
F(1) H(10A) 3.2520 yes . 3_745
F(1) H(12) 2.4153 yes . 3_745
O(1) H(3A) 3.0416 yes . 2_466
O(1) H(10B) 2.6561 yes . 2_466
O(1) H(15) 2.6629 yes . 1_455
O(1) H(16) 3.4940 yes . 1_455
O(1) H(16) 2.4360 yes . 2_466
O(1) H(1N) 2.35(5) yes . 2_466
N(1) H(16) 3.3107 yes . 2_466
C(2) H(4C) 3.5425 yes . 3_645
C(2) H(5) 3.2998 yes . 3_645
C(2) H(12) 3.3853 yes . 3_645
C(2) H(15) 3.2201 yes . 1_455
C(3) H(7A) 3.3329 yes . 2_566
C(3) H(7B) 2.9677 yes . 2_566
C(3) H(8A) 3.2763 yes . 2_566
C(3) H(9A) 3.5298 yes . 1_545
C(3) H(13) 3.2866 yes . 3_745
C(3) H(16) 3.4815 yes . 2_466
C(4) H(7C) 3.3849 yes . 3_645
C(4) H(9C) 3.5079 yes . 3_645
C(4) H(13) 3.3959 yes . 3_745
C(7) H(3A) 3.3998 yes . 2_466
C(7) H(3B) 3.5202 yes . 2_466
C(7) H(3C) 3.2454 yes . 2_466
C(7) H(9A) 3.4231 yes . 2_476
C(8) H(3A) 3.4626 yes . 2_466
C(8) H(3B) 3.3923 yes . 2_466
C(8) H(13) 3.0353 yes . 4_675
C(9) H(3B) 3.2626 yes . 1_565
C(9) H(4C) 3.5594 yes . 3_655
C(9) H(7A) 3.2635 yes . 2_576
C(10) H(9B) 3.2954 yes . 2_576
C(12) H(2B) 3.2602 yes . 3_655
C(12) H(4A) 3.4187 yes . 3_755
C(12) H(15) 3.5154 yes . 3_755
C(13) H(3B) 3.3343 yes . 3_755
C(13) H(4A) 2.8239 yes . 3_755
C(13) H(8A) 3.4500 yes . 4_674
C(13) H(8B) 3.4169 yes . 4_674
C(14) H(3B) 3.4413 yes . 3_755
C(14) H(4A) 3.2513 yes . 3_755
C(14) H(12) 3.0181 yes . 3_745
C(15) H(2B) 3.4041 yes . 1_655
C(15) H(7B) 3.5199 yes . 1_655
C(15) H(7C) 3.5951 yes . 1_655
C(15) H(12) 3.1554 yes . 3_745
C(15) H(13) 3.4232 yes . 3_745
C(16) H(3C) 3.2426 yes . 2_566
C(16) H(7B) 3.4335 yes . 1_655
H(2A) F(1) 3.1607 yes . 3_745
H(2A) H(4C) 2.8413 yes . 3_645
H(2A) H(5) 2.9134 yes . 3_645
H(2A) H(7C) 3.4281 yes . 3_645
H(2A) H(9C) 3.1801 yes . 1_545
H(2B) F(1) 3.0218 yes . 1_455
H(2B) C(12) 3.2602 yes . 3_645
H(2B) C(15) 3.4041 yes . 1_455
H(2B) H(5) 2.7858 yes . 3_645
H(2B) H(9C) 3.2443 yes . 3_645
H(2B) H(12) 2.5582 yes . 3_645
H(2B) H(15) 2.6311 yes . 1_455
H(2C) H(4C) 3.4771 yes . 3_645
H(2C) H(8A) 3.5545 yes . 2_466
H(2C) H(8C) 2.9379 yes . 2_466
H(2C) H(9B) 3.1806 yes . 1_545
H(2C) H(9C) 3.3294 yes . 1_545
H(2C) H(10B) 3.0572 yes . 2_466
H(2C) H(12) 3.5410 yes . 3_645
H(2C) H(15) 3.0574 yes . 1_455
H(3A) O(1) 3.0416 yes . 2_566
H(3A) C(7) 3.3998 yes . 2_566
H(3A) C(8) 3.4626 yes . 2_566
H(3A) H(7A) 3.4145 yes . 2_566
H(3A) H(7B) 2.6378 yes . 2_566
H(3A) H(8A) 2.7226 yes . 2_566
H(3A) H(8B) 3.4777 yes . 2_566
H(3A) H(13) 3.0792 yes . 3_745
H(3B) F(1) 2.7075 yes . 3_745
H(3B) C(7) 3.5202 yes . 2_566
H(3B) C(8) 3.3923 yes . 2_566
H(3B) C(9) 3.2626 yes . 1_545
H(3B) C(13) 3.3343 yes . 3_745
H(3B) C(14) 3.4413 yes . 3_745
H(3B) H(7A) 3.1011 yes . 2_566
H(3B) H(7B) 3.1331 yes . 2_566
H(3B) H(8A) 2.9939 yes . 2_566
H(3B) H(8B) 2.9545 yes . 2_566
H(3B) H(9A) 2.8417 yes . 1_545
H(3B) H(9B) 3.2547 yes . 1_545
H(3B) H(9C) 3.1553 yes . 1_545
H(3B) H(13) 2.7258 yes . 3_745
H(3C) C(7) 3.2454 yes . 2_566
H(3C) C(16) 3.2426 yes . 2_466
H(3C) H(7A) 2.9446 yes . 2_566
H(3C) H(7B) 2.6572 yes . 2_566
H(3C) H(9A) 3.3263 yes . 1_545
H(3C) H(9B) 3.1552 yes . 1_545
H(3C) H(10B) 2.8263 yes . 2_466
H(3C) H(16) 2.6469 yes . 2_466
H(4A) F(1) 3.4832 yes . 3_745
H(4A) C(12) 3.4187 yes . 3_745
H(4A) C(13) 2.8239 yes . 3_745
H(4A) C(14) 3.2513 yes . 3_745
H(4A) H(7C) 2.7889 yes . 3_645
H(4A) H(13) 2.6801 yes . 3_745
H(4B) H(13) 3.4205 yes . 3_745
H(4C) C(2) 3.5425 yes . 3_655
H(4C) C(9) 3.5594 yes . 3_645
H(4C) H(2A) 2.8413 yes . 3_655
H(4C) H(2C) 3.4771 yes . 3_655
H(4C) H(7C) 3.0926 yes . 3_645
H(4C) H(9C) 2.6375 yes . 3_645
H(5) C(2) 3.2998 yes . 3_655
H(5) H(2A) 2.9134 yes . 3_655
H(5) H(2B) 2.7858 yes . 3_655
H(7A) C(3) 3.3329 yes . 2_466
H(7A) C(9) 3.2635 yes . 2_476
H(7A) H(3A) 3.4145 yes . 2_466
H(7A) H(3B) 3.1011 yes . 2_466
H(7A) H(3C) 2.9446 yes . 2_466
H(7A) H(8C) 3.2081 yes . 2_476
H(7A) H(9A) 2.4713 yes . 2_476
H(7A) H(9B) 3.2384 yes . 2_476
H(7A) H(10A) 3.4416 yes . 2_476
H(7B) C(3) 2.9677 yes . 2_466
H(7B) C(15) 3.5199 yes . 1_455
H(7B) C(16) 3.4335 yes . 1_455
H(7B) H(3A) 2.6378 yes . 2_466
H(7B) H(3B) 3.1331 yes . 2_466
H(7B) H(3C) 2.6572 yes . 2_466
H(7B) H(15) 3.5601 yes . 1_455
H(7B) H(16) 3.4291 yes . 1_455
H(7C) C(4) 3.3849 yes . 3_655
H(7C) C(15) 3.5951 yes . 1_455
H(7C) H(2A) 3.4281 yes . 3_655
H(7C) H(4A) 2.7889 yes . 3_655
H(7C) H(4C) 3.0926 yes . 3_655
H(8A) C(3) 3.2763 yes . 2_466
H(8A) C(13) 3.4500 yes . 4_675
H(8A) H(2C) 3.5545 yes . 2_566
H(8A) H(3A) 2.7226 yes . 2_466
H(8A) H(3B) 2.9939 yes . 2_466
H(8A) H(13) 2.5744 yes . 4_675
H(8A) H(15) 3.1965 yes . 2_466
H(8A) H(16) 3.3264 yes . 2_466
H(8B) F(1) 3.1432 yes . 4_675
H(8B) C(13) 3.4169 yes . 4_675
H(8B) H(3A) 3.4777 yes . 2_466
H(8B) H(3B) 2.9545 yes . 2_466
H(8B) H(9A) 3.0630 yes . 2_476
H(8B) H(10A) 2.9069 yes . 2_476
H(8B) H(13) 2.7947 yes . 4_675
H(8C) H(2C) 2.9379 yes . 2_566
H(8C) H(7A) 3.2081 yes . 2_576
H(8C) H(9B) 3.0947 yes . 2_576
H(8C) H(13) 3.2746 yes . 4_675
H(9A) F(1) 3.1053 yes . 3_755
H(9A) C(3) 3.5298 yes . 1_565
H(9A) C(7) 3.4231 yes . 2_576
H(9A) H(3B) 2.8417 yes . 1_565
H(9A) H(3C) 3.3263 yes . 1_565
H(9A) H(7A) 2.4713 yes . 2_576
H(9A) H(8B) 3.0630 yes . 2_576
H(9A) H(9B) 3.3773 yes . 2_576
H(9B) C(10) 3.2954 yes . 2_476
H(9B) H(2C) 3.1806 yes . 1_565
H(9B) H(3B) 3.2547 yes . 1_565
H(9B) H(3C) 3.1552 yes . 1_565
H(9B) H(7A) 3.2384 yes . 2_576
H(9B) H(8C) 3.0947 yes . 2_476
H(9B) H(9A) 3.3773 yes . 2_476
H(9B) H(10A) 2.7257 yes . 2_476
H(9B) H(10B) 2.9465 yes . 2_476
H(9C) F(1) 2.8640 yes . 3_755
H(9C) C(4) 3.5079 yes . 3_655
H(9C) H(2A) 3.1801 yes . 1_565
H(9C) H(2B) 3.2443 yes . 3_655
H(9C) H(2C) 3.3294 yes . 1_565
H(9C) H(3B) 3.1553 yes . 1_565
H(9C) H(4C) 2.6375 yes . 3_655
H(10A) F(1) 3.2520 yes . 3_755
H(10A) H(7A) 3.4416 yes . 2_576
H(10A) H(8B) 2.9069 yes . 2_576
H(10A) H(9B) 2.7257 yes . 2_576
H(10B) O(1) 2.6561 yes . 2_566
H(10B) H(2C) 3.0572 yes . 2_566
H(10B) H(3C) 2.8263 yes . 2_566
H(10B) H(9B) 2.9465 yes . 2_576
H(12) F(1) 2.4153 yes . 3_755
H(12) C(2) 3.3853 yes . 3_655
H(12) C(14) 3.0181 yes . 3_755
H(12) C(15) 3.1554 yes . 3_755
H(12) H(2B) 2.5582 yes . 3_655
H(12) H(2C) 3.5410 yes . 3_655
H(12) H(15) 2.8138 yes . 3_755
H(13) C(3) 3.2866 yes . 3_755
H(13) C(4) 3.3959 yes . 3_755
H(13) C(8) 3.0353 yes . 4_674
H(13) C(15) 3.4232 yes . 3_755
H(13) H(3A) 3.0792 yes . 3_755
H(13) H(3B) 2.7258 yes . 3_755
H(13) H(4A) 2.6801 yes . 3_755
H(13) H(4B) 3.4205 yes . 3_755
H(13) H(8A) 2.5744 yes . 4_674
H(13) H(8B) 2.7947 yes . 4_674
H(13) H(8C) 3.2746 yes . 4_674
H(13) H(15) 3.0324 yes . 3_755
H(15) S(1) 2.9185 yes . 1_655
H(15) O(1) 2.6629 yes . 1_655
H(15) C(2) 3.2201 yes . 1_655
H(15) C(12) 3.5154 yes . 3_745
H(15) H(2B) 2.6311 yes . 1_655
H(15) H(2C) 3.0574 yes . 1_655
H(15) H(7B) 3.5601 yes . 1_655
H(15) H(8A) 3.1965 yes . 2_566
H(15) H(12) 2.8138 yes . 3_745
H(15) H(13) 3.0324 yes . 3_745
H(15) H(1N) 3.5709 yes . 2_566
H(16) S(1) 3.3897 yes . 2_566
H(16) O(1) 3.4940 yes . 1_655
H(16) O(1) 2.4360 yes . 2_566
H(16) N(1) 3.3107 yes . 2_566
H(16) C(3) 3.4815 yes . 2_566
H(16) H(3C) 2.6469 yes . 2_566
H(16) H(7B) 3.4291 yes . 1_655
H(16) H(8A) 3.3264 yes . 2_566
H(16) H(1N) 2.9429 yes . 2_566
H(1N) O(1) 2.35(5) yes . 2_566
H(1N) H(15) 3.5709 yes . 2_466
H(1N) H(16) 2.9429 yes . 2_466

#==============================================================================

#==============================================================================
# Additional structures and associated data_? identifiers
# should be added at this point if there is more than one 
# structure analysis in the CIF.

#==============================================================================
#     End of CIF
#==============================================================================
